# Supplementary material for: KIF4 regulates neuronal morphology and seizure susceptibility via the PARP1 signaling pathway
Source: PubMed Central journal article supplement — J Cell Biol. 2022 Dec 8;222(2):e202208108. doi: 10.1083/jcb.202208108 (PMC9735414; doi:10.1083/jcb.202208108), 2022-12-08

Brain Hippo  
WT/Y Mut/Y

TrkB FL  
TrkB T1

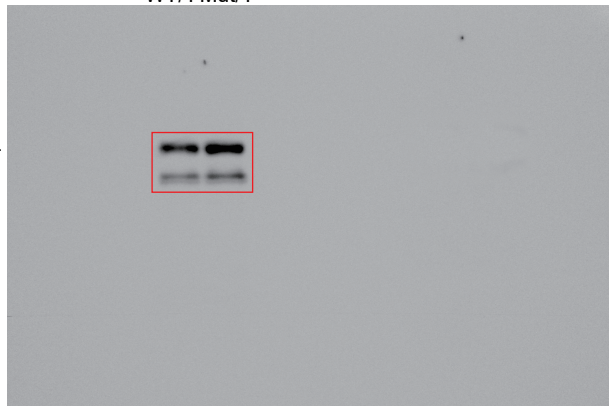

Brain Hippo  
WT/Y Mut/Y

GluR1

GABAAR

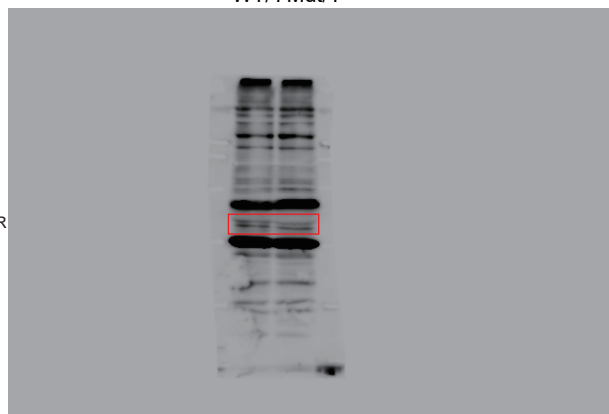

Brain Hippo  
WT/Y Mut/Y

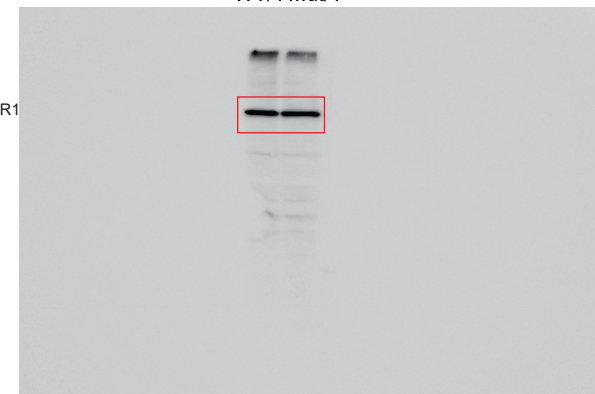

Brain Hippo  
WT/Y Mut/Y

PAR

PARP1

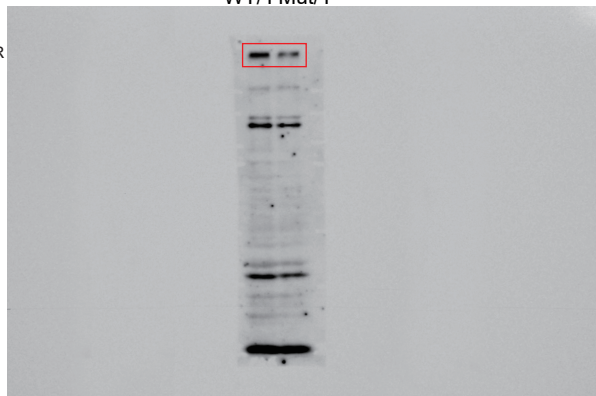

Brain Hippo  
WT/Y Mut/Y

KCC2

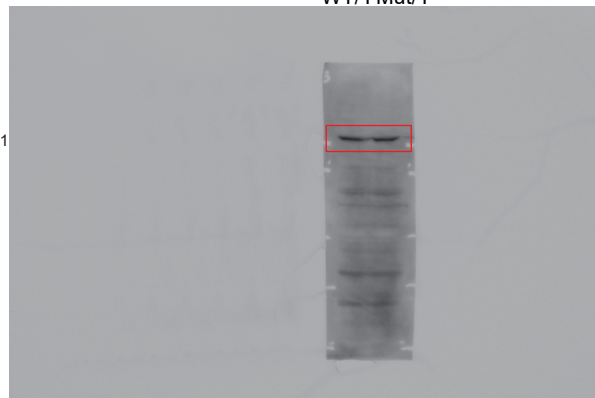

Brain Hippo  
WT/Y Mut/Y

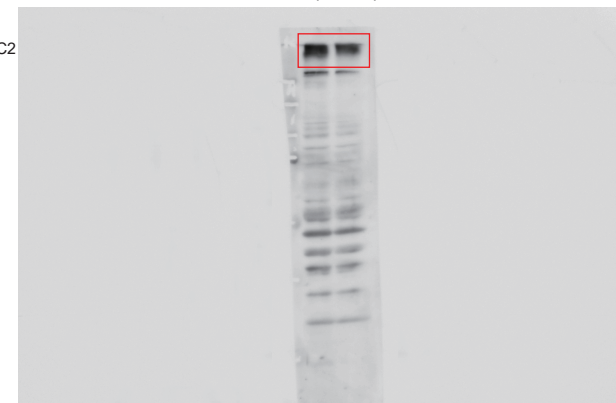

Brain Hippo  
WT/Y Mut/Y

Tubulin

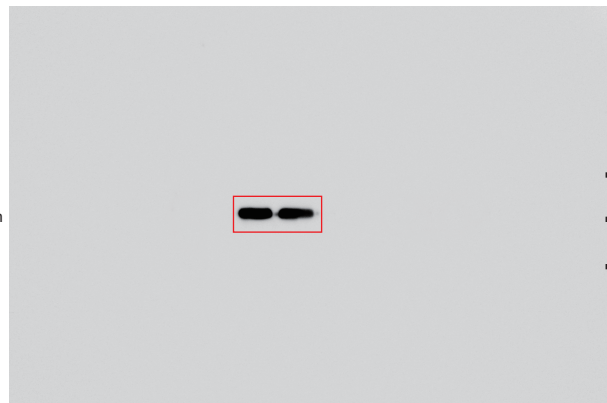

Brain Hippo  
WT/Y Mut/Y

Actin

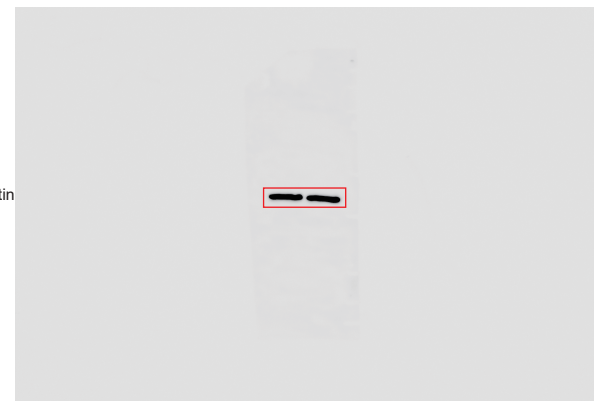

Brain M1  
WT/YMut/Y

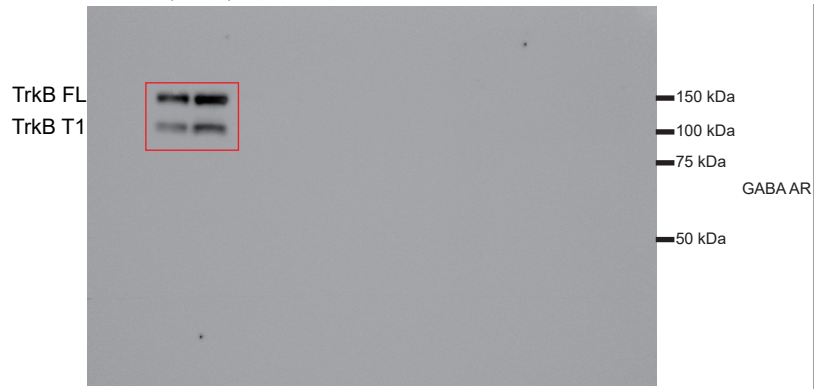

Brain M1  
WT/YMut/Y

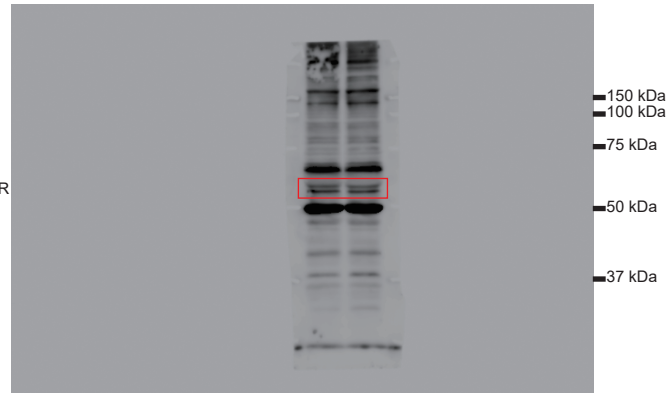

Brain M1  
WT/YMut/Y

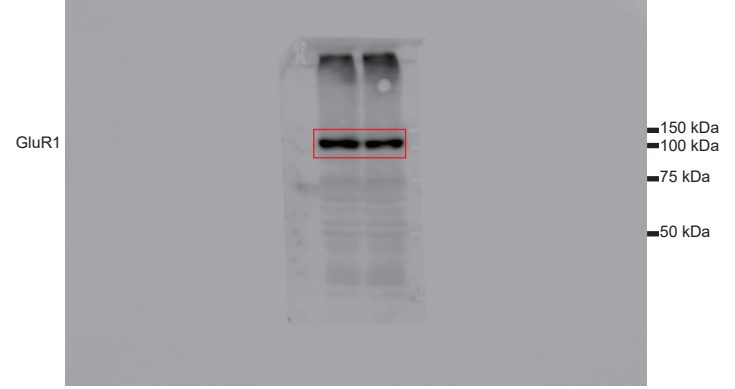

Brain M1  
WT/YMut/Y

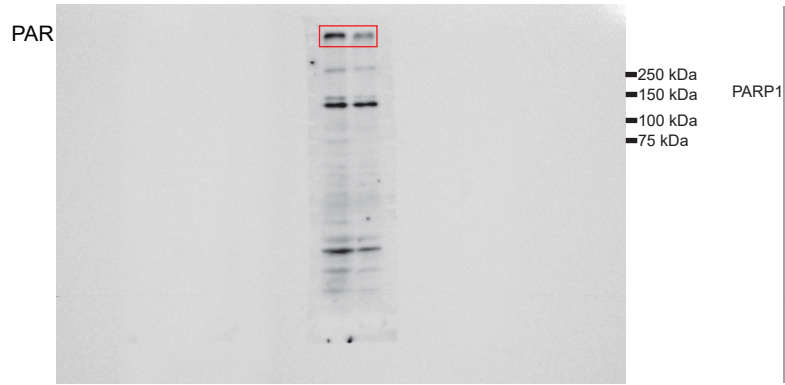

Brain M1  
WT/YMut/Y

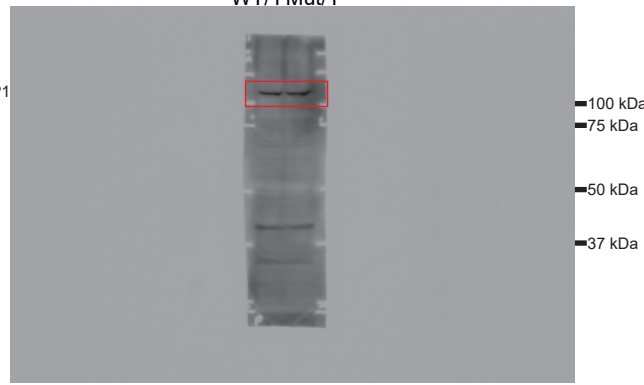

Brain M1  
WT/YMut/Y

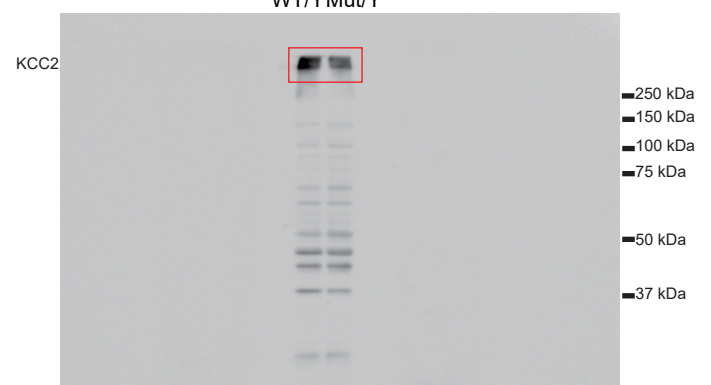

Brain M1  
WT/YMut/Y

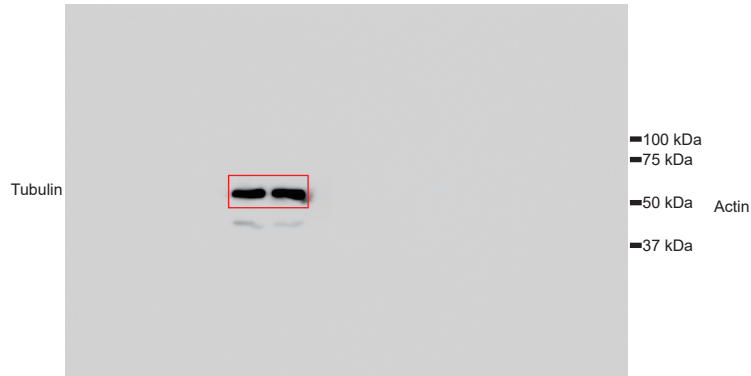

Brain M1  
WT/YMut/Y

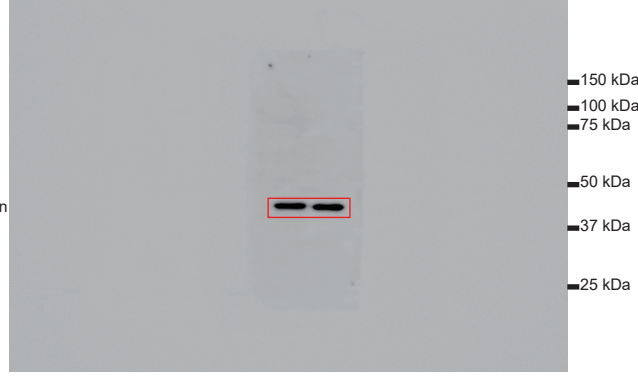

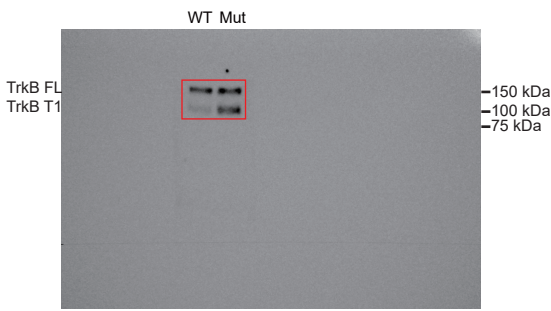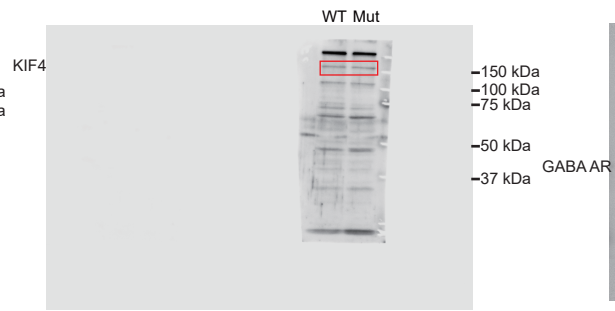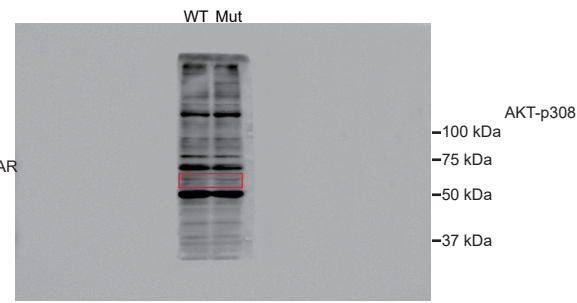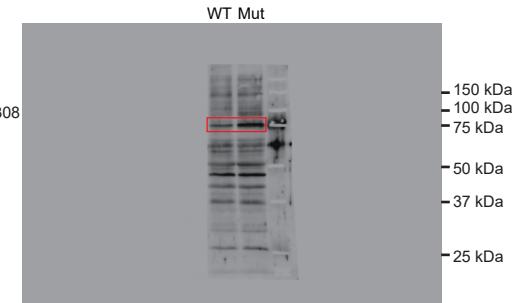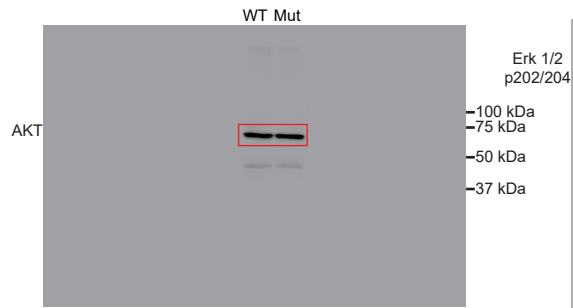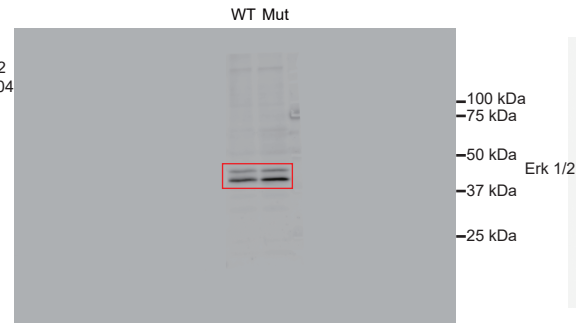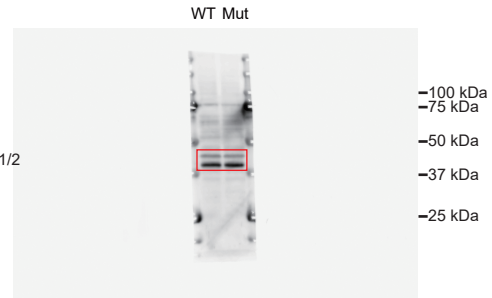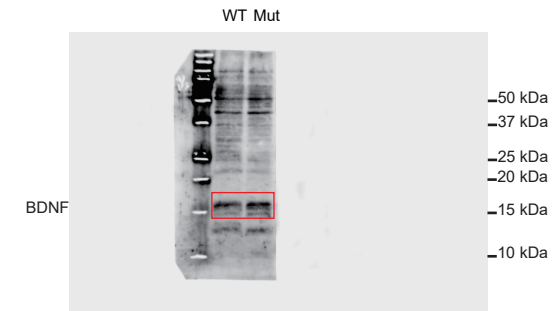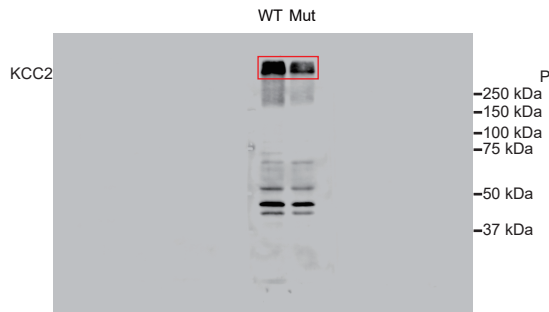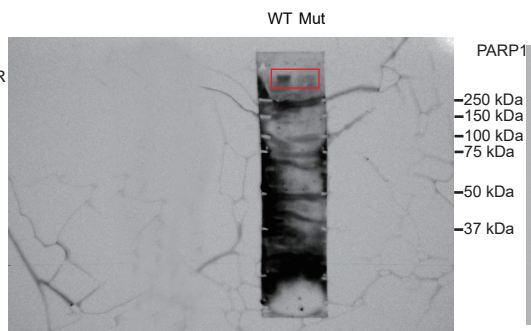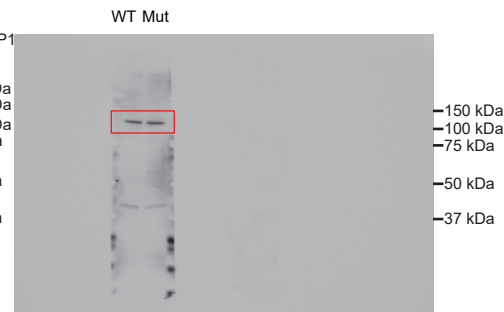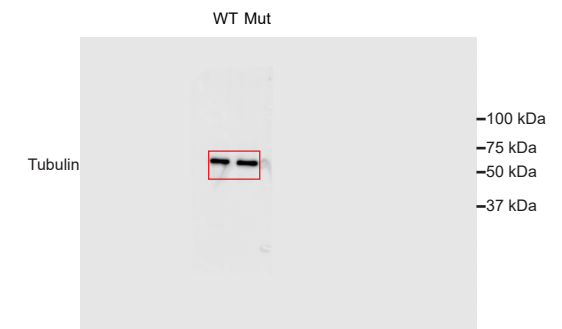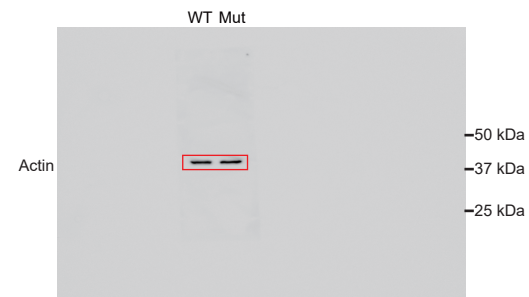

Supplement: JCB_202208108_SourceDataF5.pdf [file JCB_202208108_SourceDataF5.pdf]
