# Supplementary figures and images for: KIF4 regulates neuronal morphology and seizure susceptibility via the PARP1 signaling pathway
Source: PubMed Central journal article supplement — J Cell Biol. 2022 Dec 8;222(2):e202208108. doi: 10.1083/jcb.202208108 (PMC9735414; doi:10.1083/jcb.202208108), 2022-12-08

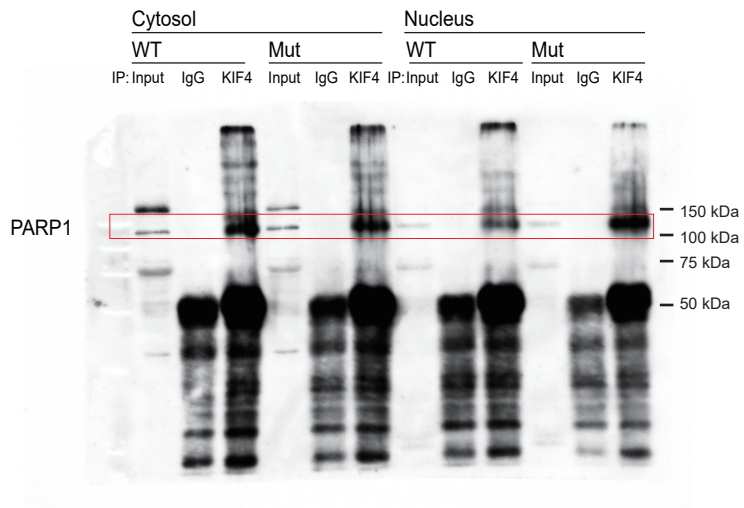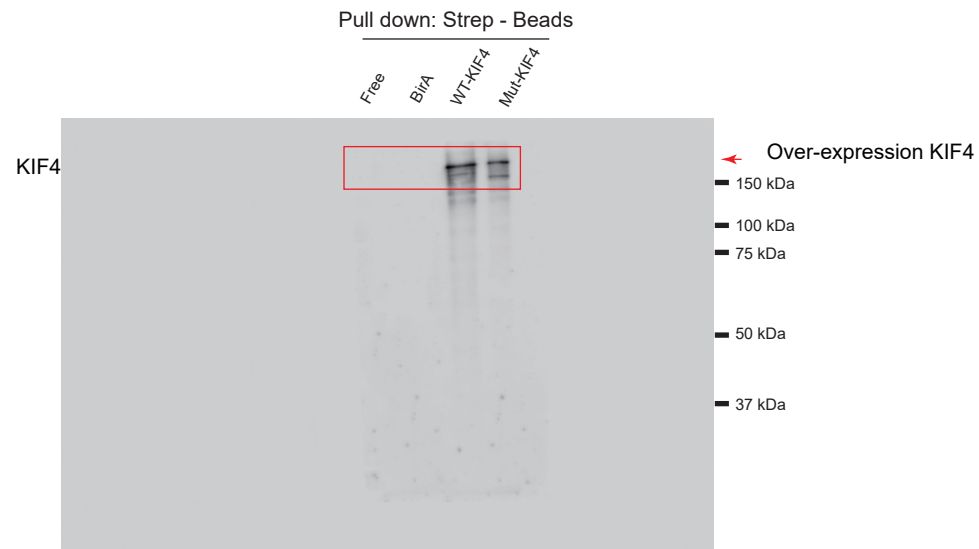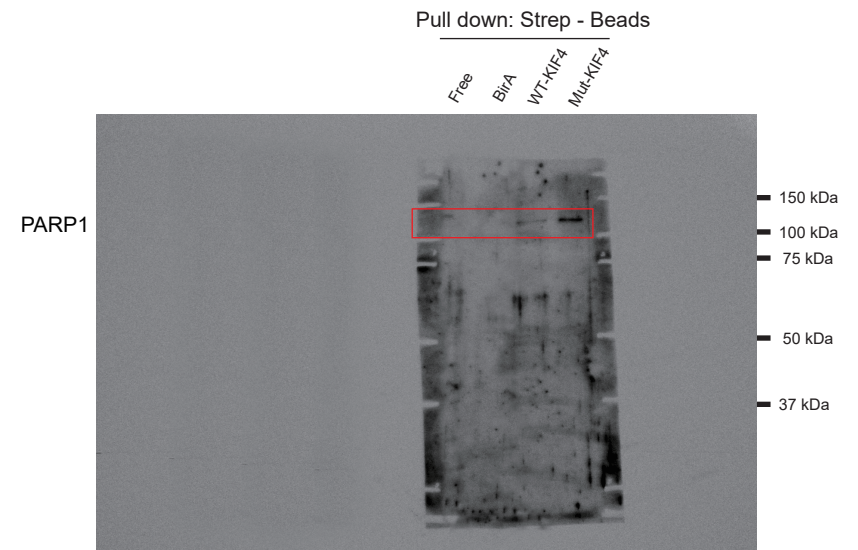

Supplement: JCB_202208108_SourceDataF4.pdf [file JCB_202208108_SourceDataF4.pdf]

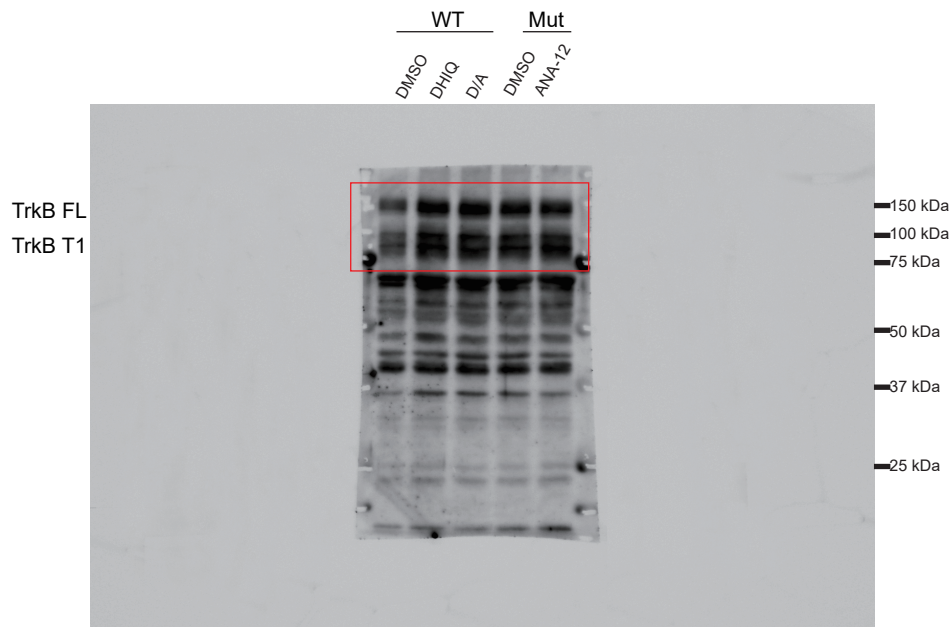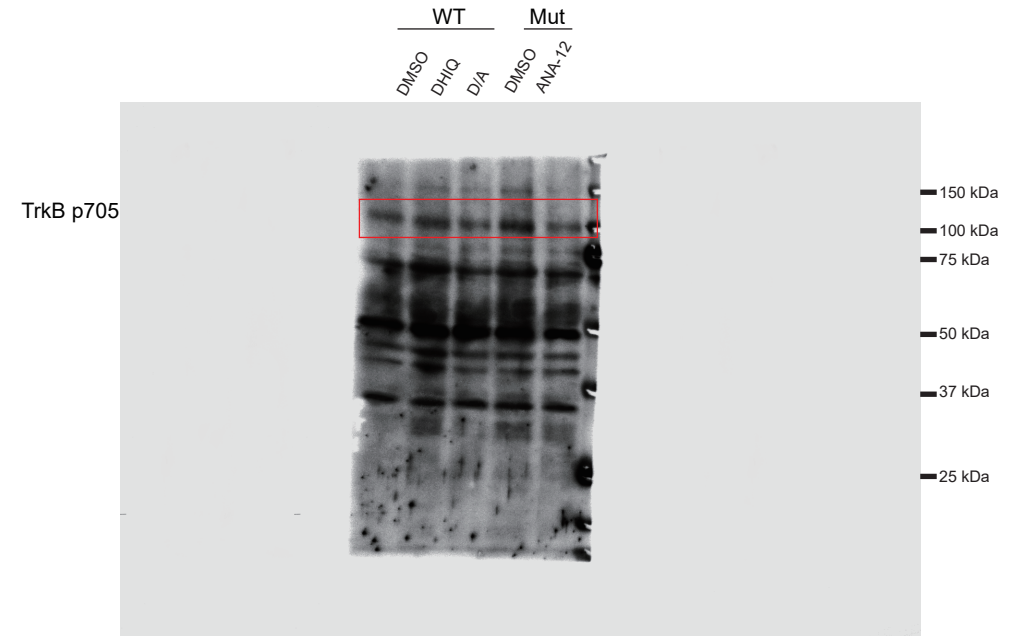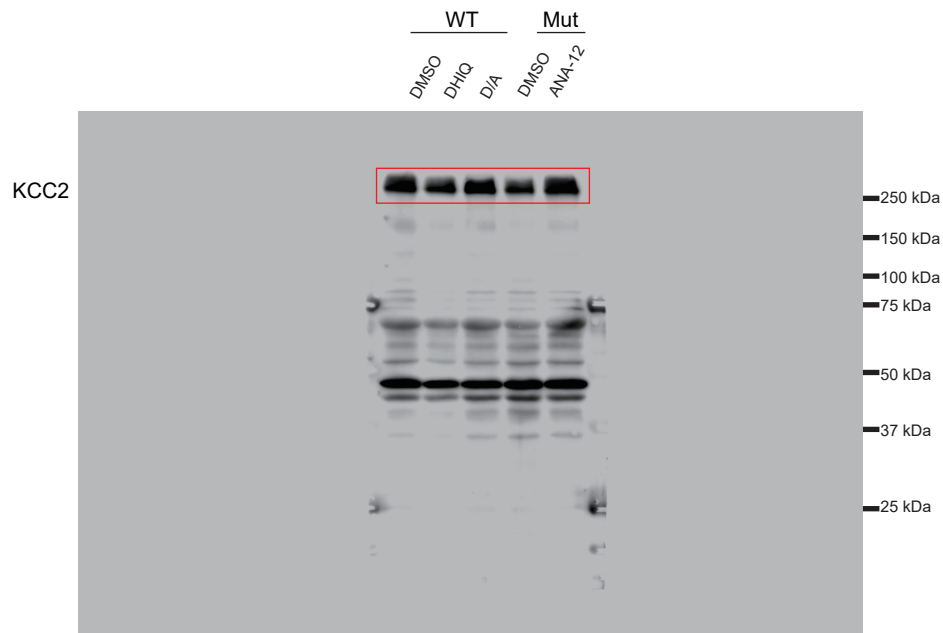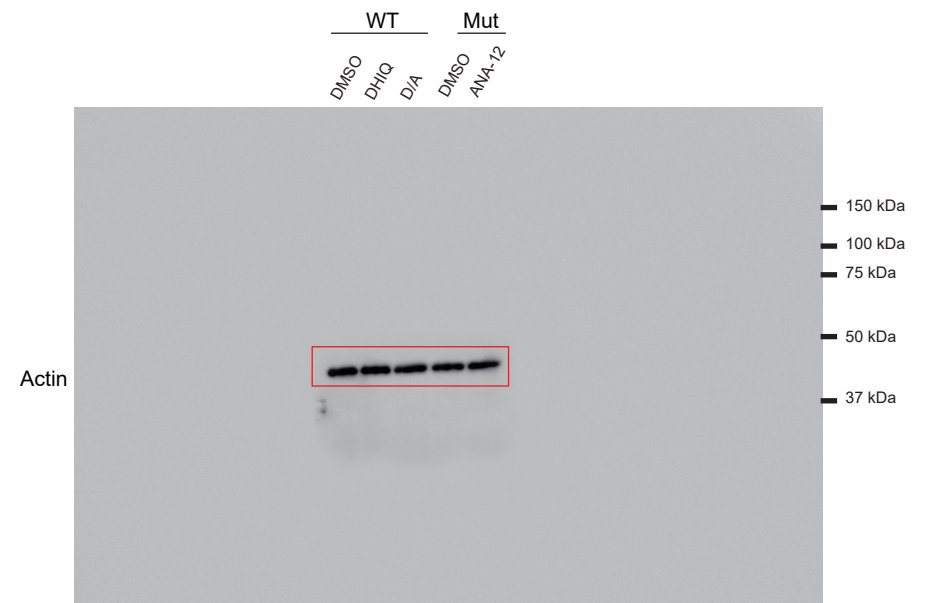

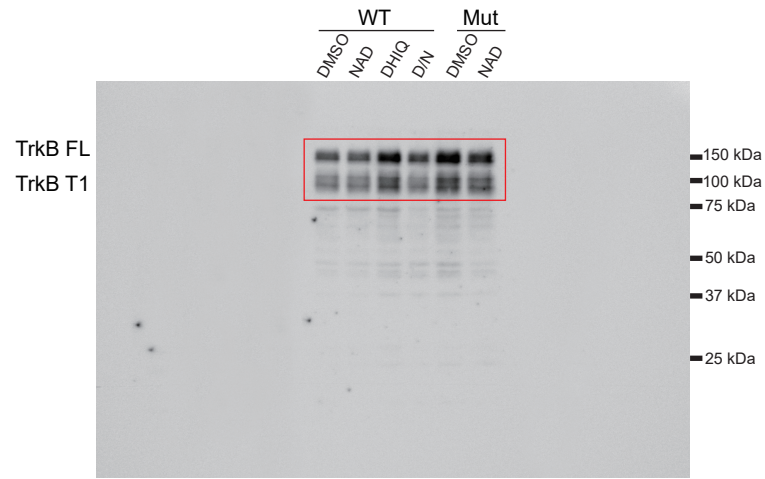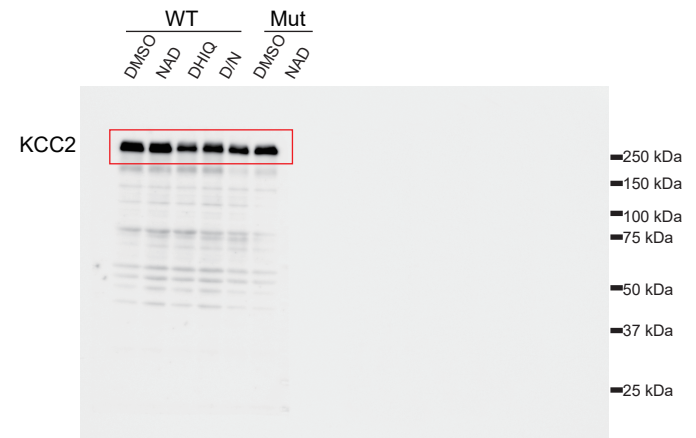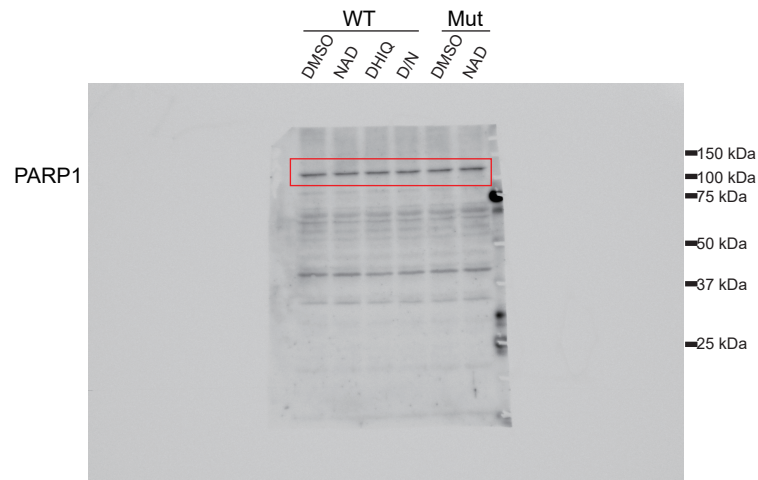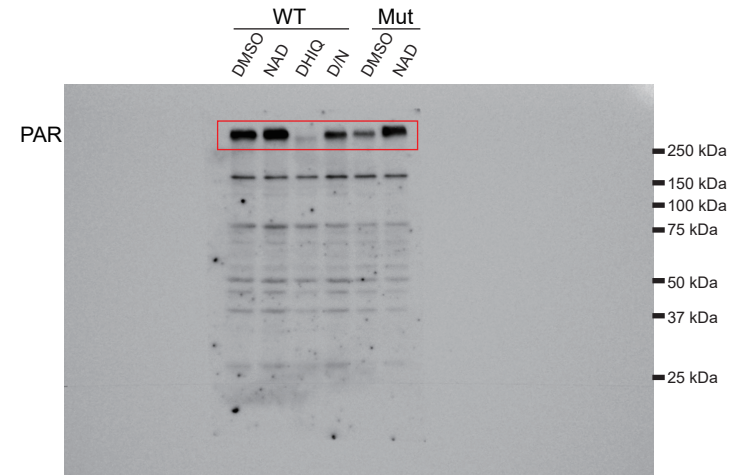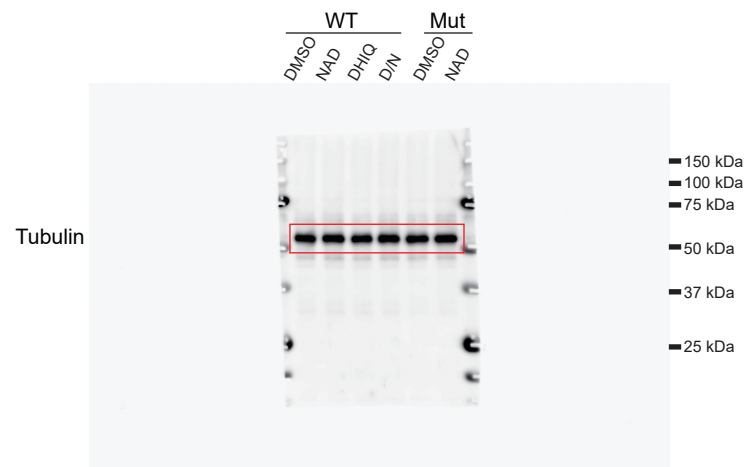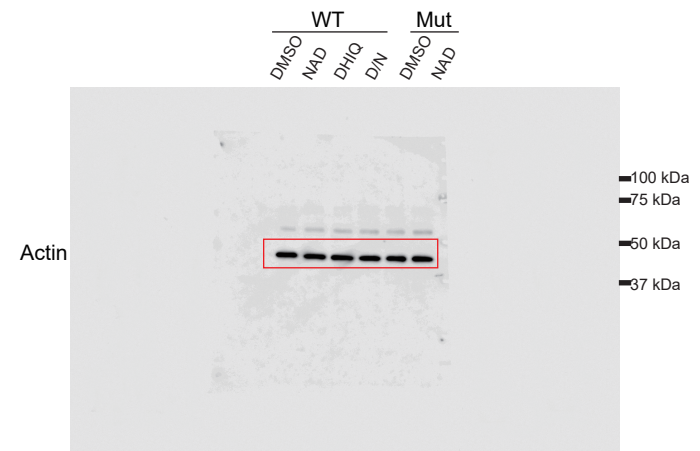

Supplement: JCB_202208108_SourceDataF6.pdf [file JCB_202208108_SourceDataF6.pdf]

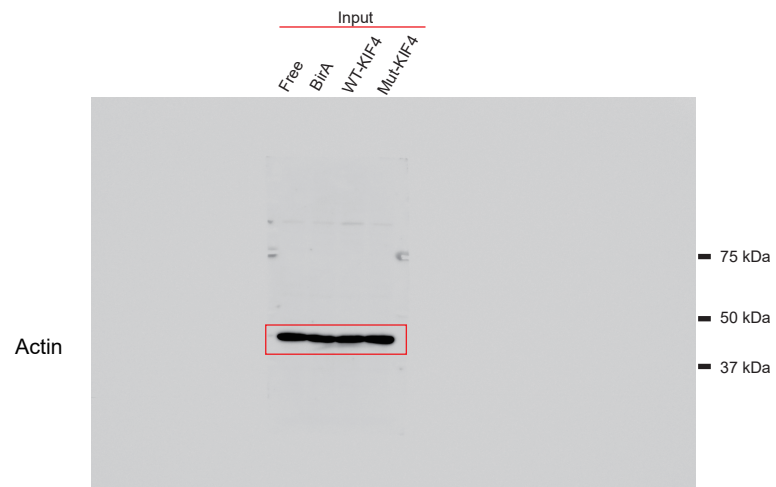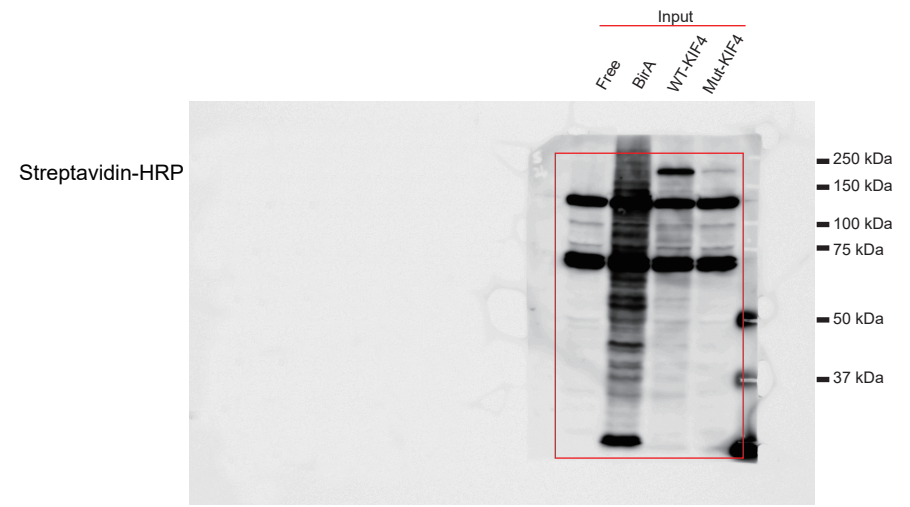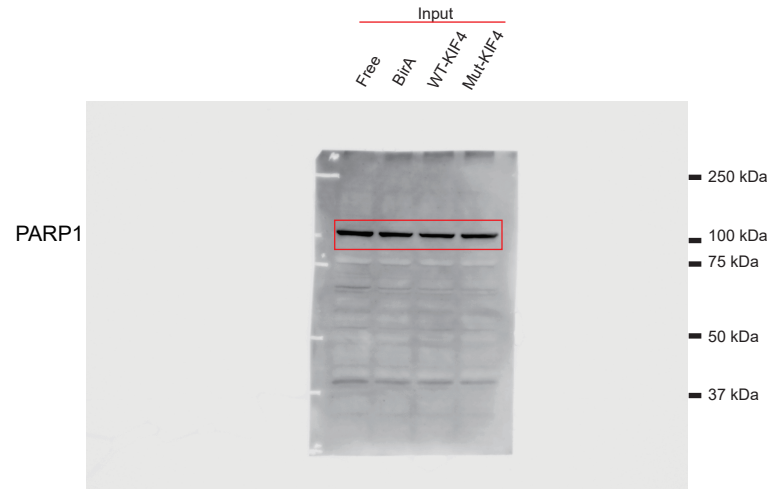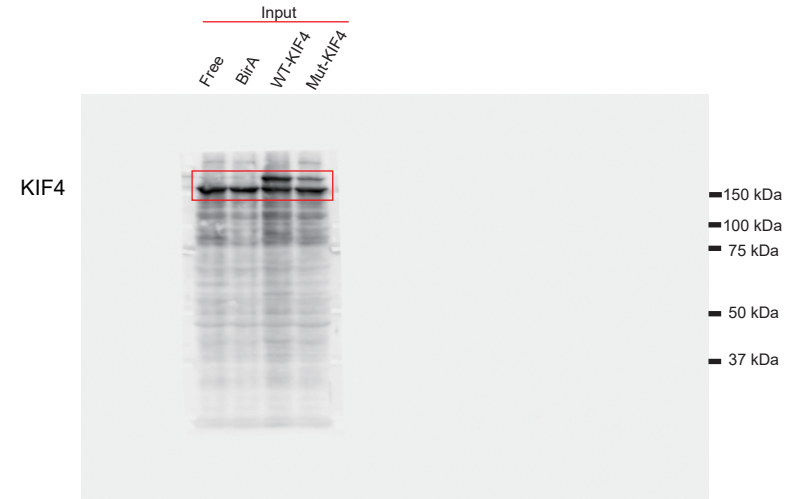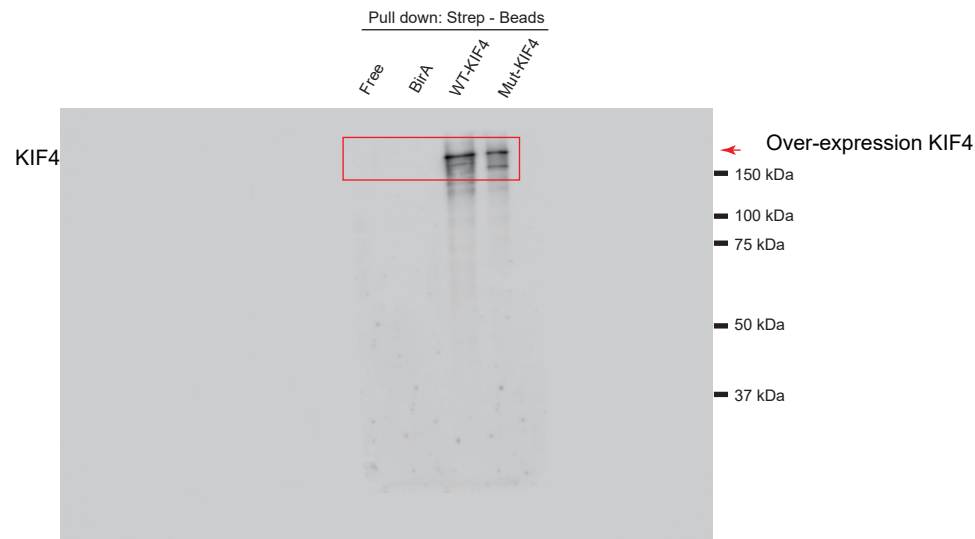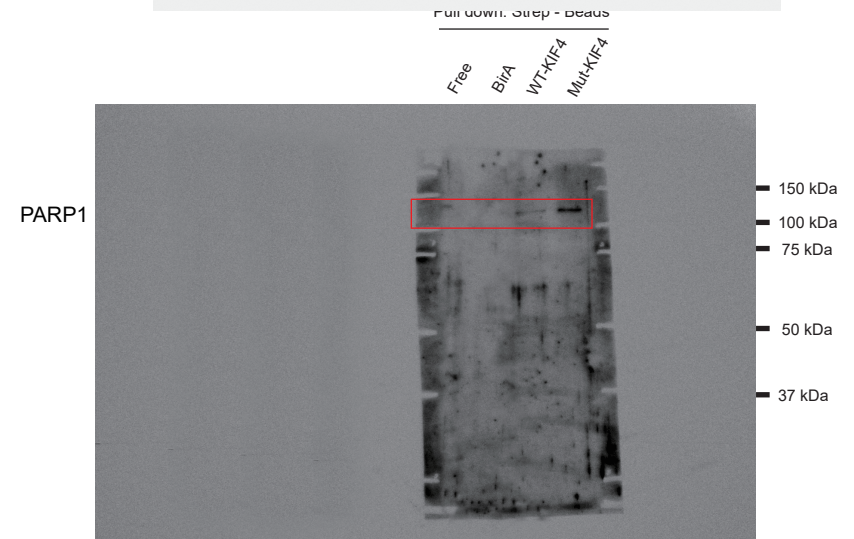

Supplement: JCB_202208108_SourceDataFS3.pdf [file JCB_202208108_SourceDataFS3.pdf]
